# Supplementary material for: One step forward to a scalable synthesis of platinum–yttrium alloy nanoparticles on mesoporous carbon for the oxygen reduction reaction
Source: Royal Society of Chemistry journal article supplement (doi:10.1039/c6ta04498k), 2016-01-01
Supplement: c6ta04498k1.pdf [file c6ta04498k1.pdf]

# One Step forward to a Scalable Synthesis of Platinum-Yttrium alloyed Nanoparticles on Mesoporous Carbon for Oxygen Reduction Reaction

*R. Brandiele,<sup>a</sup> C. Durante,<sup>a,\*</sup> E. Grądzka,<sup>b</sup> G. A. Rizzi,<sup>a</sup> J. Zheng,<sup>a</sup> D. Badocco,<sup>a</sup> P. Centomo,<sup>a</sup>  
P. Pastore,<sup>a</sup> G. Granozzi<sup>a</sup> and A. Gennaro.<sup>a,\*</sup>*

<sup>a</sup>Department of Chemical Sciences, University of Padua, Via Marzolo 1, 35131 Padova, Italy.

\*Correspondence - [christian.durante@unipd.it](mailto:christian.durante@unipd.it), [armando.gennaro@unipd.it](mailto:armando.gennaro@unipd.it)

<sup>b</sup>Institute of Chemistry, University of Białystok, K. Ciolkowskiego 1K, 15-245 Białystok, Poland.

## Electronic Supplementary Information

## 1. Experimental section supporting Information.

The cell glassware and components were soaked in concentrated acid/oxidizing agent ( $\text{H}_2\text{SO}_4$  Traceselect grade + Nochromix) in large beakers placed in a hood and subsequently were rinsed thoroughly and boiled in deionized (DI) water. Between electrochemical experiments, the glassware and components were stored submerged under DI water.

The ICP-MS was tuned daily using a tuning solution containing  $1 \mu\text{g L}^{-1}$   $^{140}\text{Ce}$ ,  $^7\text{Li}$ ,  $^{205}\text{Tl}$ , and  $^{89}\text{Y}$  (Agilent Technologies, UK). A  $100 \mu\text{g L}^{-1}$  solution of  $^{45}\text{Sc}$  and  $^{115}\text{In}$  (Aristar, BDH, UK) prepared in  $\text{HNO}_3$  1.38% was used as internal standard through addition to the sample solution via a T-junction. Multielement standard solutions for calibration were prepared by gravimetric serial dilution at six different concentrations (from  $10 \mu\text{g L}^{-1}$  to  $500 \mu\text{g L}^{-1}$ ) obtained using as solvent a 5:1  $\text{HNO}_3/\text{HCl}$  mixture diluted to 5% by weight. All regressions were linear with a correlation coefficient ( $R^2$ ) larger than 0.9999.

Multi-element calibration standard-1, 100 mL: 10 mg/L of Ce, Dy, Er, Eu, Gd, Ho, La, Lu, Nd, Pr, Sc, Sm, Tb, Th, Tm, Y, Yb; matrix 5%  $\text{HNO}_3$  Cod: 8500-6944 (Agilent Technologies, UK). Multi-element calibration standard-3, 100 mL: 10 mg/L of Sb, Au, Hf, Ir, Pd, Pt, Rh, Ru, Te, Sn; matrix 10%  $\text{HCl}/1\% \text{HNO}_3$  Cod: 8500-6948 (Agilent Technologies, UK).

A microwave acidic digestion was performed with a CEM EXPLORER SP-D PLUS. 5 mg of samples ( $\text{Pt}_x\text{Y@MC}$ ) was weighed and digested in 7 g of mixture 1:1  $\text{HNO}_3/\text{HCl}$  according to the following microwave acid mineralization procedure: ramp temperature from room to  $220^\circ\text{C}$  in 10 min, then  $220^\circ\text{C}$  for 3 min, pressure 400 PSI, power 300 W and stirring “medium”. The solutions were diluted with the same solvent used for calibrations.

## 2. Figures.

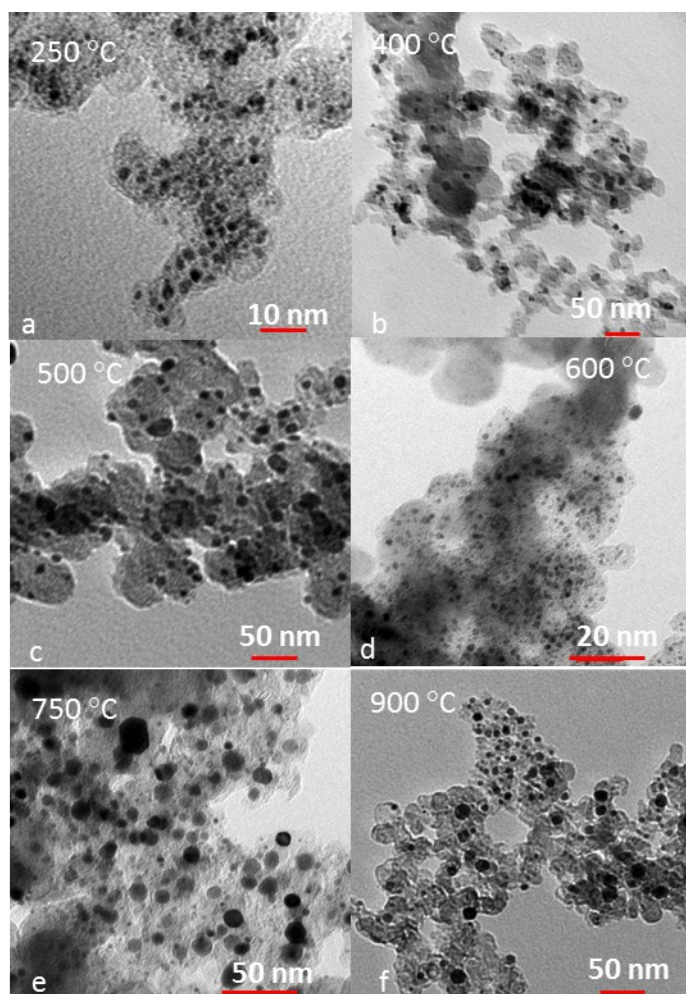

**Figure S1.** TEM images of Pt<sub>x</sub>Y samples obtained from the co-reduction of PtCl<sub>2</sub> and Y(NO<sub>3</sub>)<sub>3</sub> on mesoporous carbon at different temperatures.

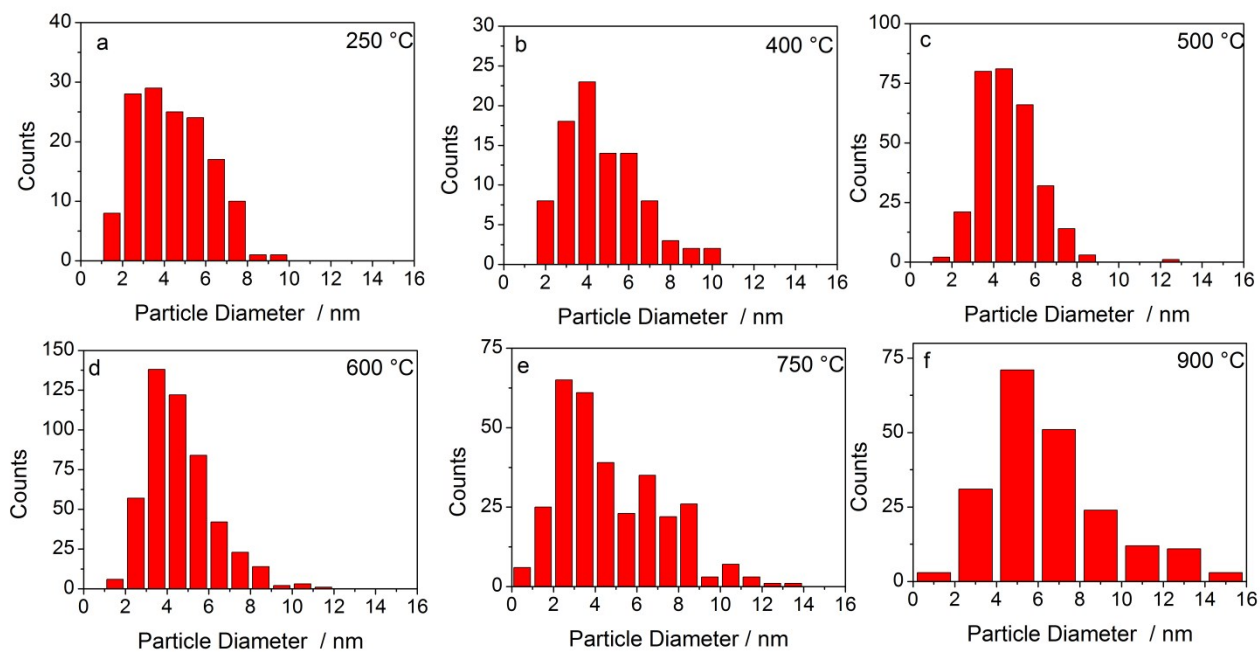

**Figure S2.** Pt<sub>x</sub>Y particle size distribution for catalysts obtained from co-reduction of PtCl<sub>2</sub> and Y(NO<sub>3</sub>)<sub>3</sub> on mesoporous carbon at different temperatures.

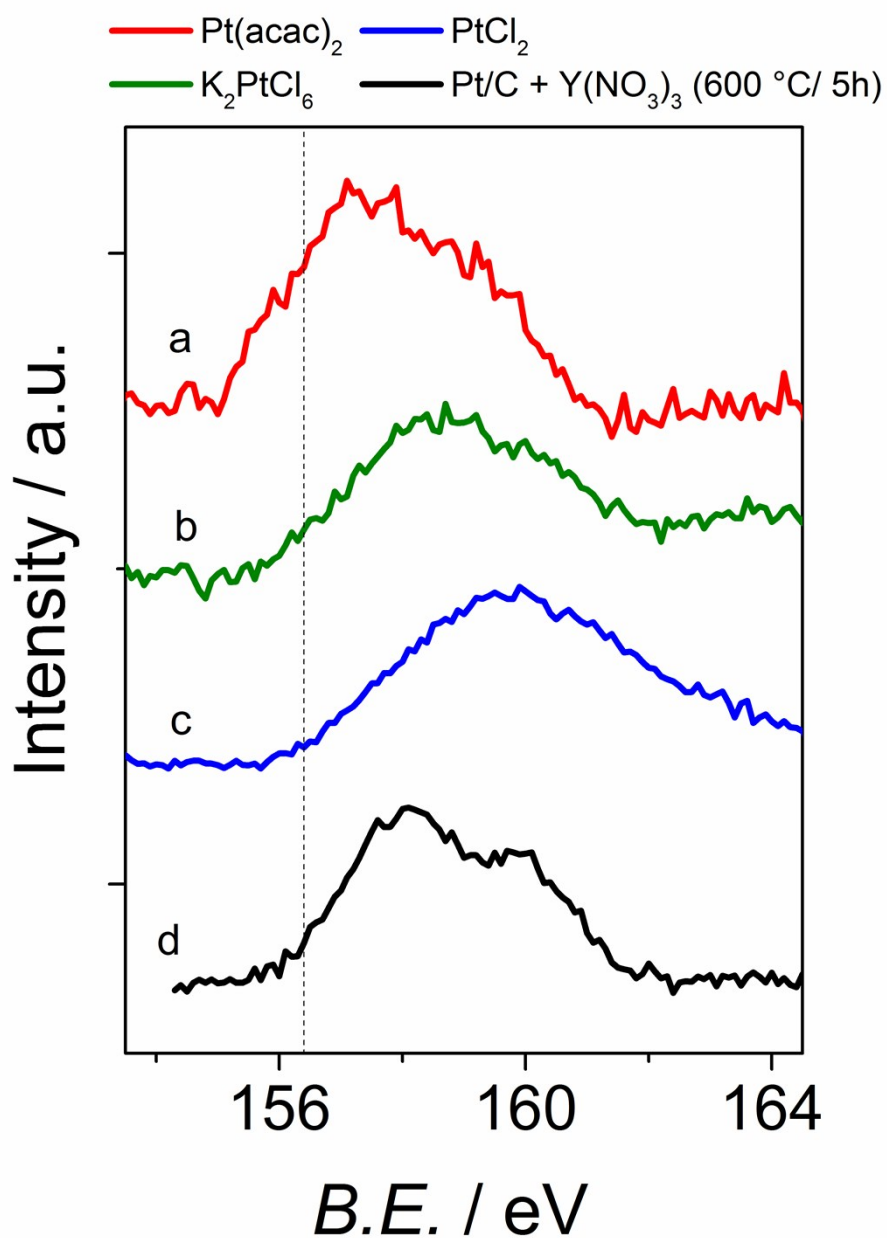

**Figure S3.** Y 3d XPS feature of Pt<sub>x</sub>Y samples obtained from a) Pt(acac)<sub>2</sub>, b) K<sub>2</sub>PtCl<sub>6</sub>, c) PtCl<sub>2</sub> and Y(NO<sub>3</sub>)<sub>3</sub>·6H<sub>2</sub>O at 600 °C for 3 hours; d) Pt/C (Pt 30% on Vulcan) and Y(NO<sub>3</sub>)<sub>3</sub>·6H<sub>2</sub>O at 600 °C for 5 hours

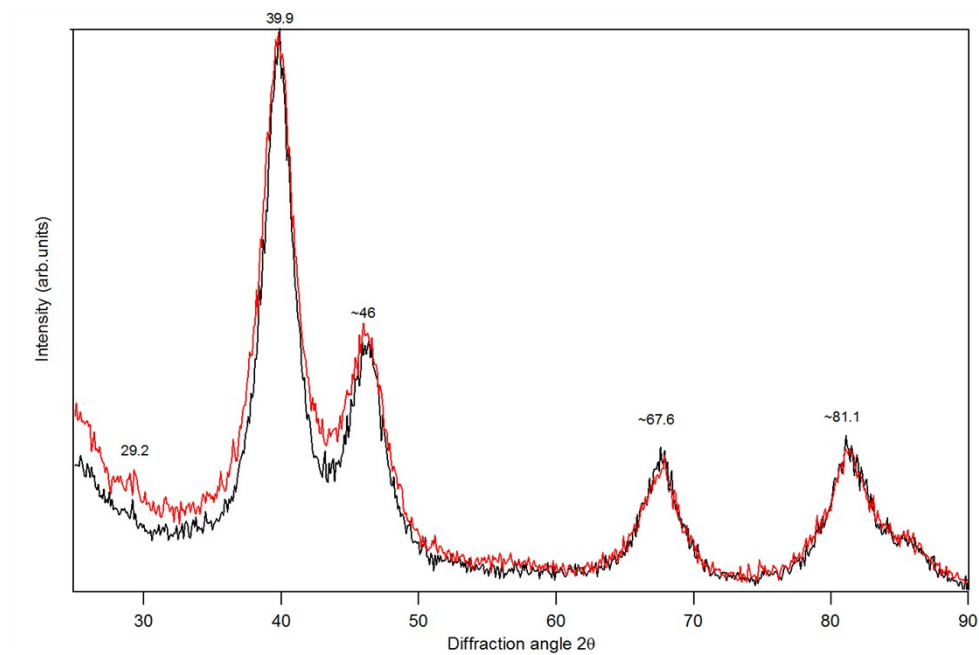

Figure S4. XRD spectra of Pt<sub>x</sub>Y600h5 (red curve) compared with that of pure Pt NPs (black curve).

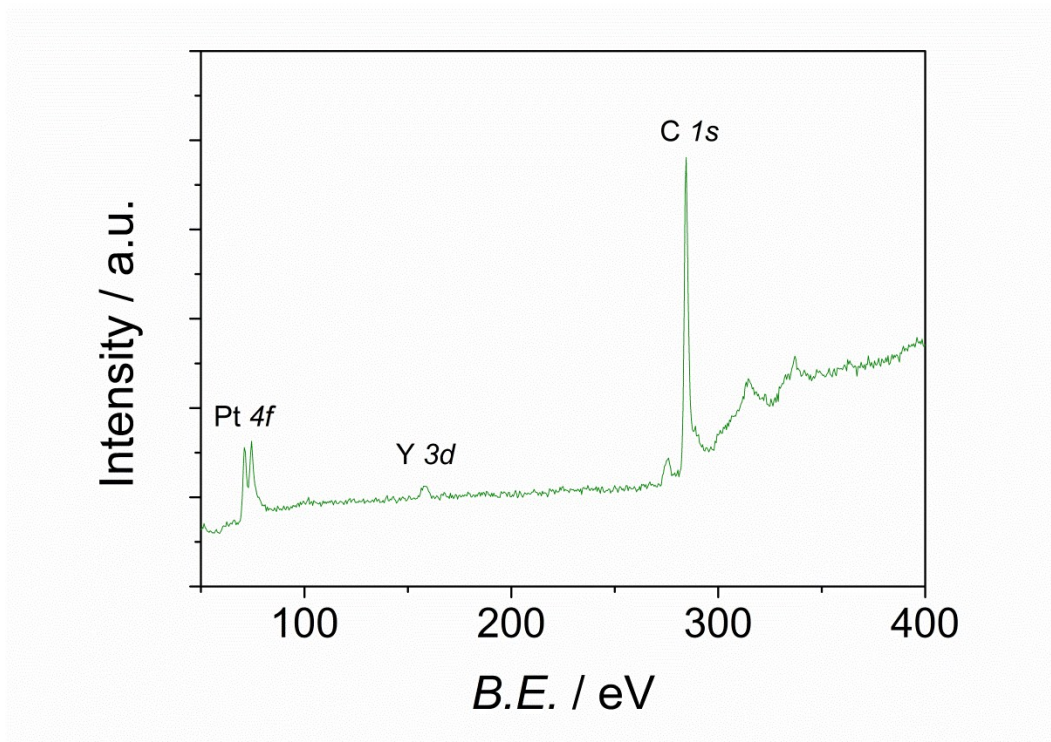

Figure S5. XPS survey of Pt<sub>x</sub>Y600h5

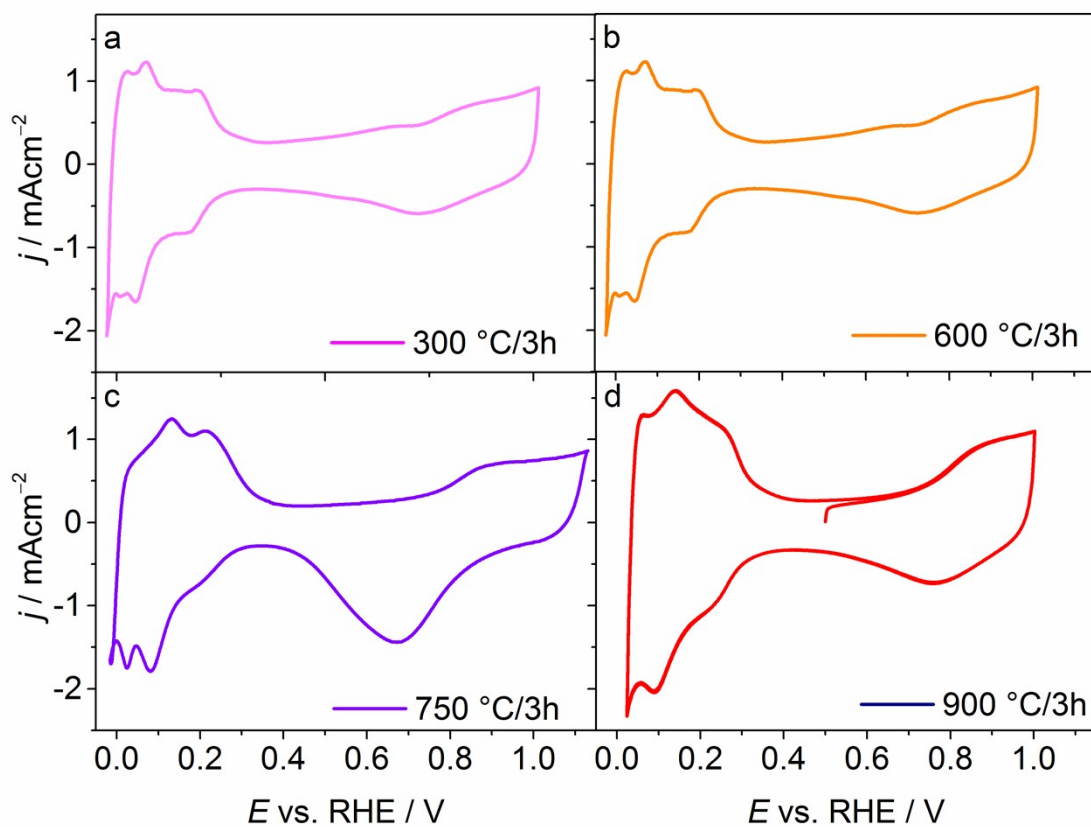

Figure S6. Cyclic voltammograms of different  $\text{Pt}_x\text{Y}$  catalysts. CVs recorded at scan rate of  $50\text{ mV s}^{-1}$  in Ar purged  $0.1\text{ M HClO}_4$  at  $25\text{ }^{\circ}\text{C}$ .
